# Supplementary material for: Risk Factors for Nodal Failure in Patients with FIGO IIIC Cervical Cancer Receiving Definitive Image-Guided Radiotherapy
Source: MDPI journal article supplement (doi:10.3390/curroncol30120756), 2023-12-08
Supplement: s1 [file s1]

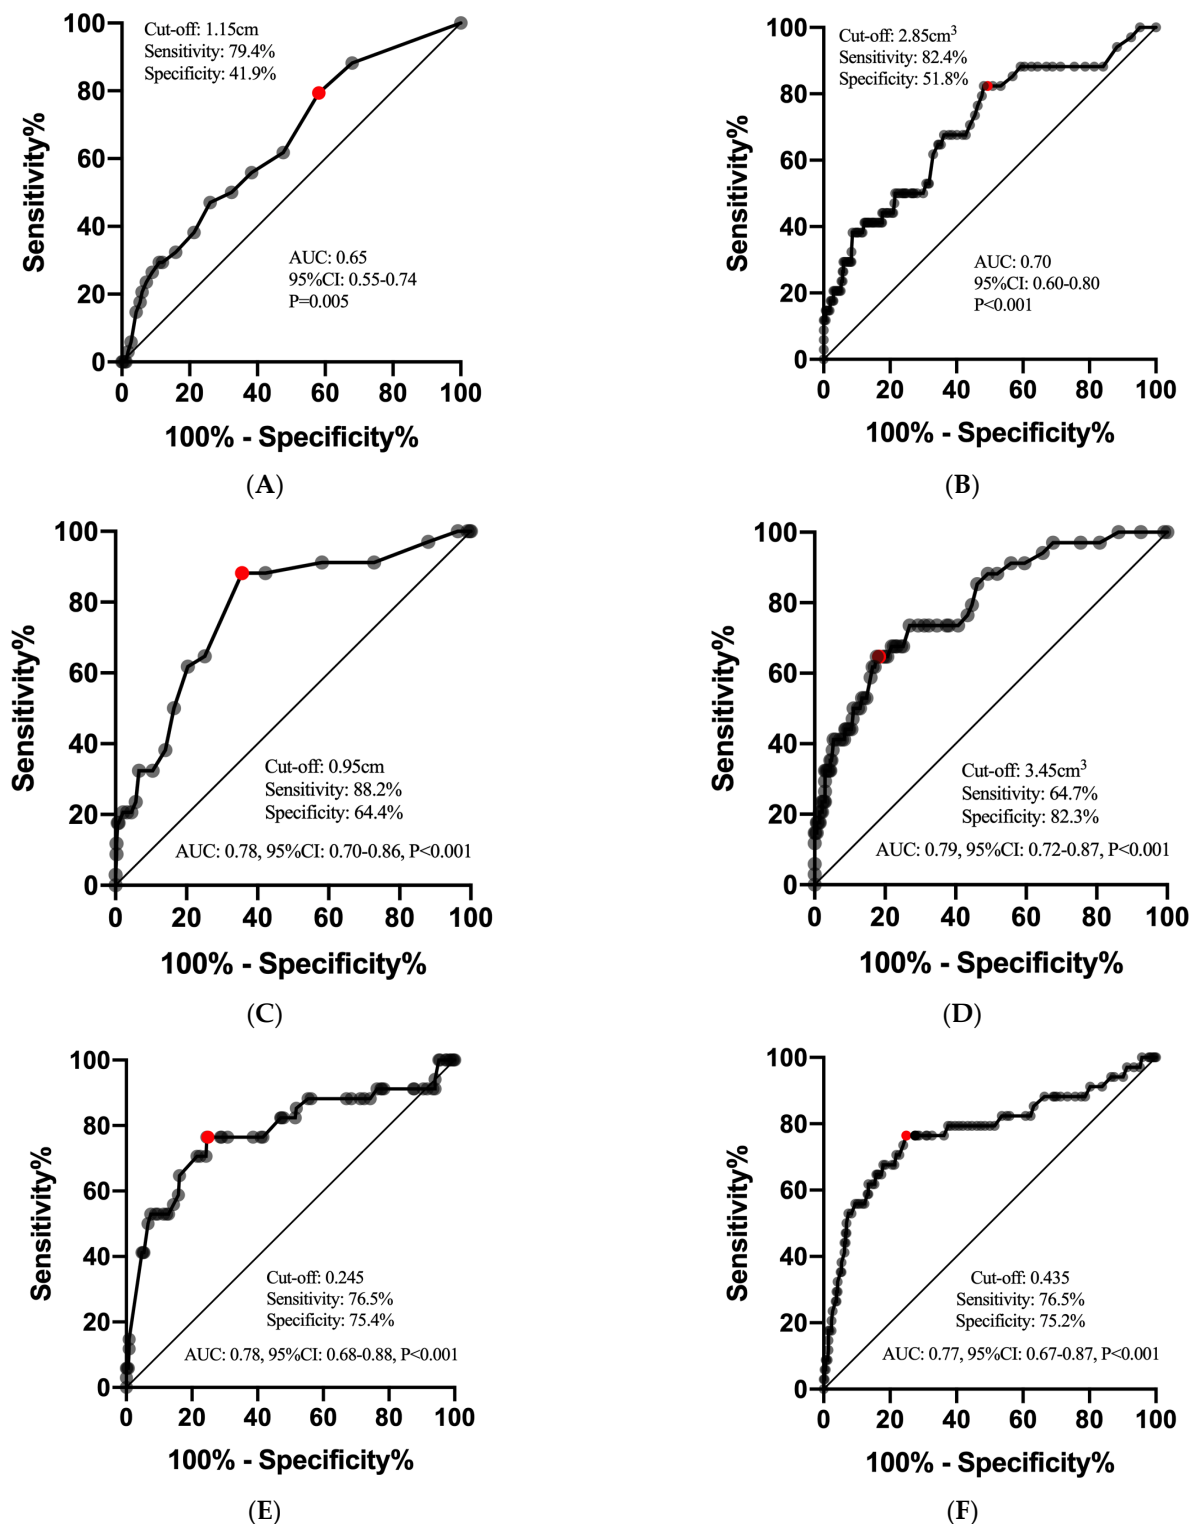

**Figure S1.** ROC curves for characteristics of LNs predicting nodal failure. (A) ROC curve for  $D_{pre}$  predicting nodal failure. The red point referred to the optimal cut-off value for  $D_{pre}$  (1.15cm) (B). ROC curve for  $V_{pre}$  predicting nodal failure. The red point referred to the optimal cut-off value for  $V_{pre}$  (2.85cm<sup>3</sup>); (C) ROC curve for  $D_{20}$  predicting nodal failure. The red point referred to the optimal cut-off value for  $D_{20}$  (0.95cm); (D) ROC curve for  $V_{20}$  predicting nodal failure. The red point referred to the optimal cut-off value for  $V_{20}$  (3.45cm<sup>3</sup>); (E) ROC curve for  $\Delta D_{20F}$  predicting nodal failure. The red point referred to the optimal cut-off value for  $\Delta D_{20F}$  (0.245); (F) ROC curve for  $\Delta V_{20F}$  predicting nodal failure. The red point referred to the optimal cut-off value for  $\Delta V_{20F}$  (0.435).
